# Supplementary material
Source: HighWire-hosted journal article supplement (https://bmjopenquality.bmj.com/content/12/2/e002216)
Supplement: inline-supplementary-material-1 [file inline-supplementary-material-1.pdf]

| Local Enhanced Service                                                          | Cost / rate details                                                                                                              |
|---------------------------------------------------------------------------------|----------------------------------------------------------------------------------------------------------------------------------|
| Contraception LARC / IUCD 6wk review                                            | £30.35 per procedure                                                                                                             |
| LARC / IUCD Insertion                                                           | £91.04 per procedure                                                                                                             |
| Depo-provera injection                                                          | £11.01 per procedure                                                                                                             |
| Alternative Health Care Scheme (SLA with one Bridgend Practice only)            | £82.34 per patient / month                                                                                                       |
| Alternative Health Care Scheme – retainer (SLA with one Bridgend Practice only) | 516.77 per month                                                                                                                 |
| Asylum Seeker patients (Swansea locality only)                                  | Per patient/quarter; ie Qtr1 £150, Qtr2 £90, Qtr 3-4 £66; max 1 year                                                             |
| Asylum Seeker patients - retainer (Swansea locality only)                       | Per quarter;<br>£254.38/ yr 11-25 patients<br>£508.75/ yr 26-50 patients,<br>£763.13/ yr 51-75 patients<br>>75 patients £1017.50 |
| Syrian Refugee patients                                                         | Per patient quarter Qtr1 £150, Qtr2 £90, Qtr 3-4 £66; max 1 year                                                                 |
| Complex wound care (SLA with selected practices)                                | £12 per procedure                                                                                                                |
| Simple wound care and suture removal                                            | £7.20 per procedure                                                                                                              |
| DOACs initiation                                                                | £66 per patient / once                                                                                                           |
| DOACs monitoring                                                                | £30 per patient                                                                                                                  |

#### Appendix 1. Local Enhanced Service, ABMU Health Board
